# Supplementary material
Source: PubMed Central journal article supplement (PMC7446570)

**A**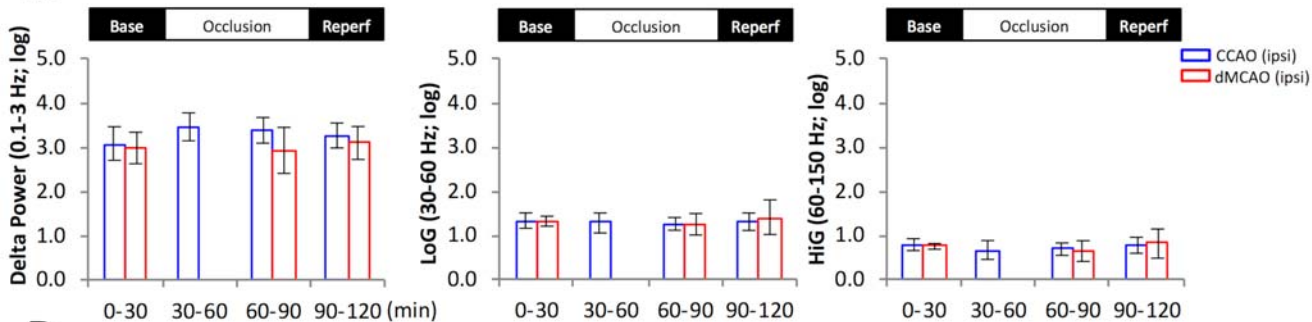**B**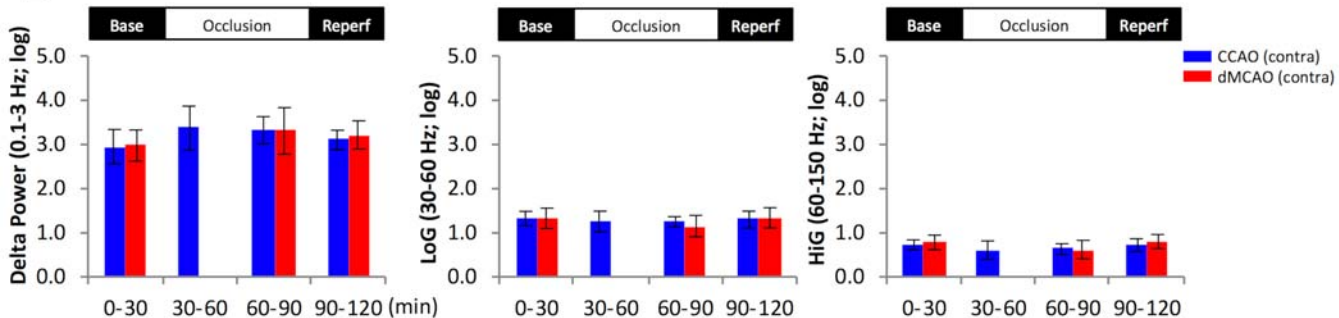

Supplement: JCB877889_Supplemental_Material2.pdf [file JCB877889_Supplemental_Material2.pdf]
